# Supplementary material for: Evaluation of the Infectious Potential of Neoparamoeba perurans Following Freshwater Bathing Treatments
Source: MDPI journal article supplement (doi:10.3390/microorganisms9050967), 2021-04-29
Supplement: s1 [file s1]

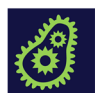

Article

# Evaluation of the Infectious Potential of *Neoparamoeba perurans* Following Freshwater Bathing Treatments

Richard S. Taylor <sup>1\*</sup>, Joel Slinger <sup>2,3</sup>, Chris Stratford <sup>2</sup>, Megan Rigby <sup>1</sup> and James W. Wynne <sup>1</sup>

<sup>1</sup> CSIRO Agriculture and Food, Castray Esplanade, Hobart, TAS 7000, Australia; megan.rigby@csiro.au (M.R.); james.wynne@csiro.au (J.W.W)

<sup>2</sup> CSIRO Agriculture and Food, Bribie Island Research Centre, Woorim, QLD 4507, Australia; joel.slinger@csiro.au (J.S); chris.stratford@csiro.au (C.S)

<sup>3</sup> Institute for Marine and Antarctic Studies, University of Tasmania, Launceston, TAS 7250, Australia; joel.slinger@utas.edu.au

\* Correspondence: richard.taylor@csiro.au; Tel: +61-3-62-325-089 (R.S.T)

**Citation:** Taylor, R.S.; Slinger, J.; Stratford, C.; Rigby, M.; Wynne, J.W. Evaluation of the Infectious Potential of *Neoparamoeba perurans* Following Freshwater Bathing Treatments. *Microorganisms* **2021**, *9*, 967. <https://doi.org/10.3390/microorganisms9050967>

Academic Editor: María Teresa Gómez-Muñoz

Received: 31 March 2021

Accepted: 27 April 2021

Published: 29 April 2021

**Publisher's Note:** MDPI stays neutral with regard to jurisdictional claims in published maps and institutional affiliations.

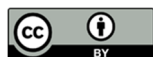

**Copyright:** © 2021 by the author. Licensee MDPI, Basel, Switzerland. This article is an open access article distributed under the terms and conditions of the Creative Commons Attribution (CC BY) license (<http://creativecommons.org/licenses/by/4.0/>).

## Supplementary materials

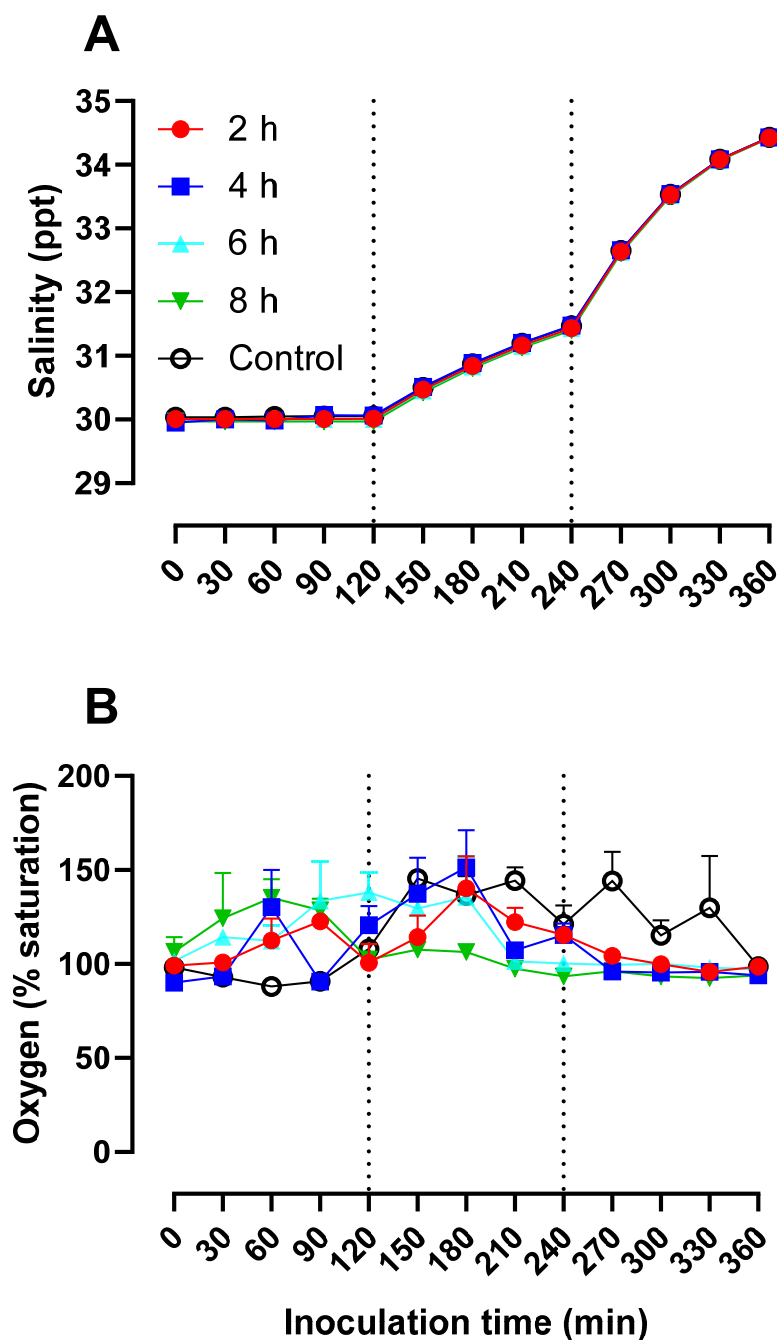

**Figure S1.** Water quality parameters during the AGD used bathwater and control inoculation. (A) Salinity of 30 ppt was created by mixture of 40 L of bathwater/freshwater in 260 L of 35 ppt seawater. After 120 min seawater was introduced at 1 L/min, allowing the tank to slowly fill and salinity gradually increased. From 240 min, seawater flow was increased to 7 L/min. Error bars are not visible due to low variation between tanks. (B) Oxygen was controlled by constant aeration and supplementary oxygenation (manual control). Mean + standard error of the mean (SEM).

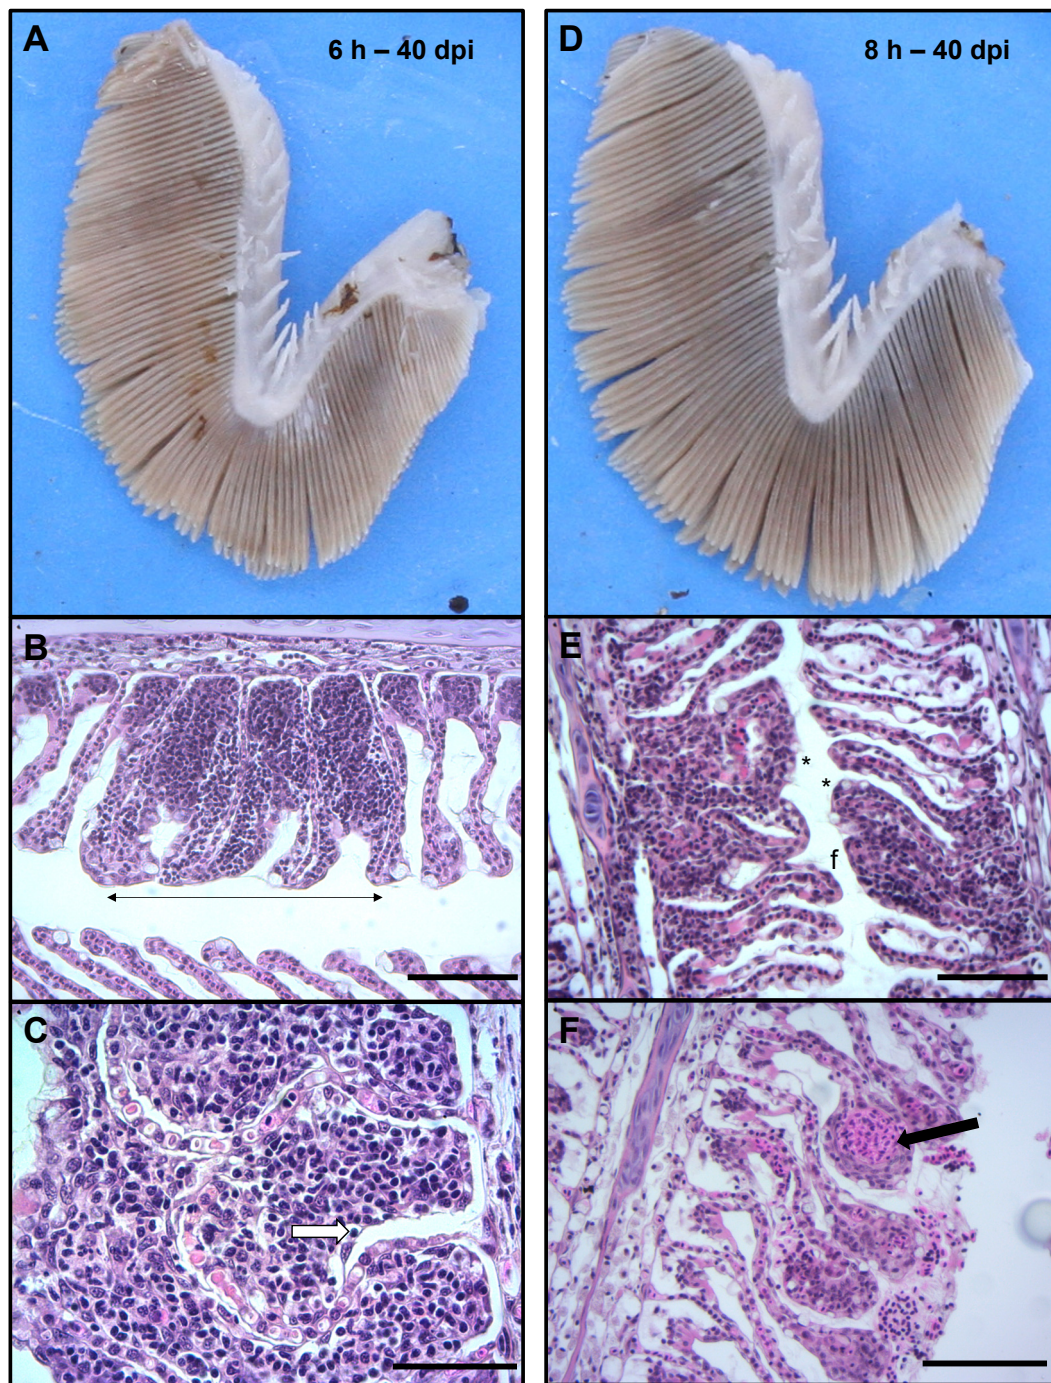

**Figure S2.** Gross images representative of 6 h (A) and 8 h (D) bathwater challenged fish (at 40 dpi) with no apparent AGD expression. Subsequent histological sections targeted areas of non-normal branchial pathology that was not associated to AGD pathology or disease expression; (B) – Nodules of predominately lymphocytic infiltration affecting several interlamellar units (double arrow) at 200x magnification, scale bar = 100µm. (C) – further magnification of lymphocytic nodule (400x mag) with obvious lymphocytes present (white arrow), scale bar = 50 µm. (E) – Area of congestion (200x mag) characterised by lamellar fusion (f) and epithelial lifting. Proliferative margins have concentrations of mucosal cells (\*), scale bar = 100µm. (F) – Several telangiectasis lesions formed at the lamellar tips, with some evidence of lamellar thrombosis (black arrow) with fibrinous material, indicating lesion area was resolving. Scale bar = 50µm.
